# Supplementary material
Source: publisher figshare collection journal article supplement (https://tandf.figshare.com/articles/dataset/_/7082681)

**Fig. 1 A-C**

**A DIV3 (young neurons)**

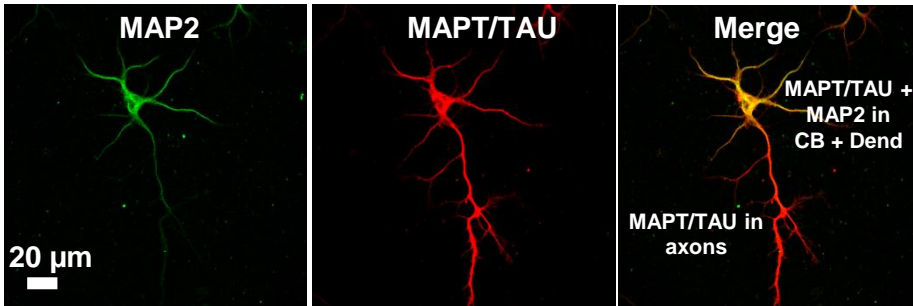

**B DIV10 (mature neurons)**

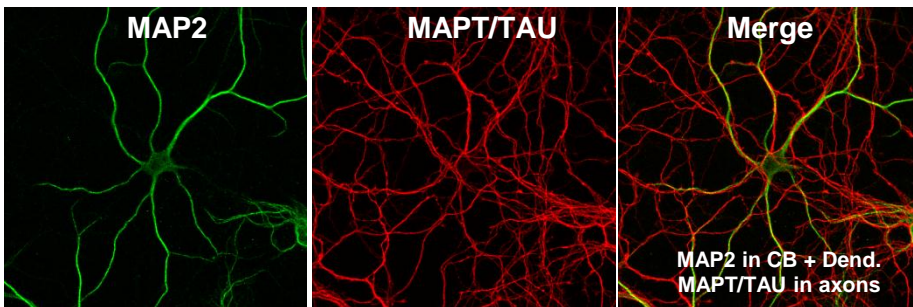

**C**

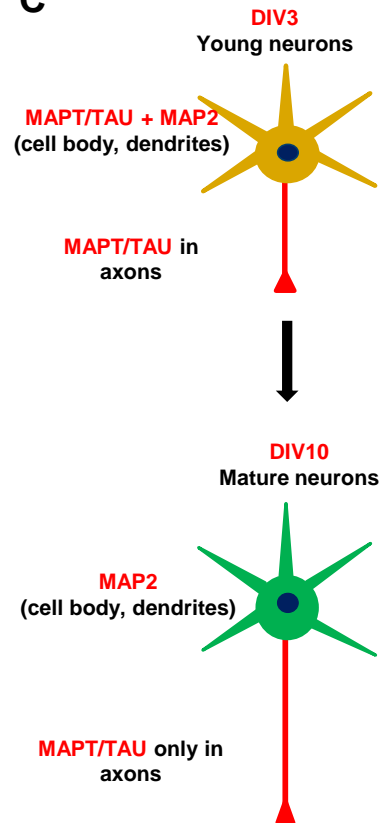

**Fig. 2 A-E**

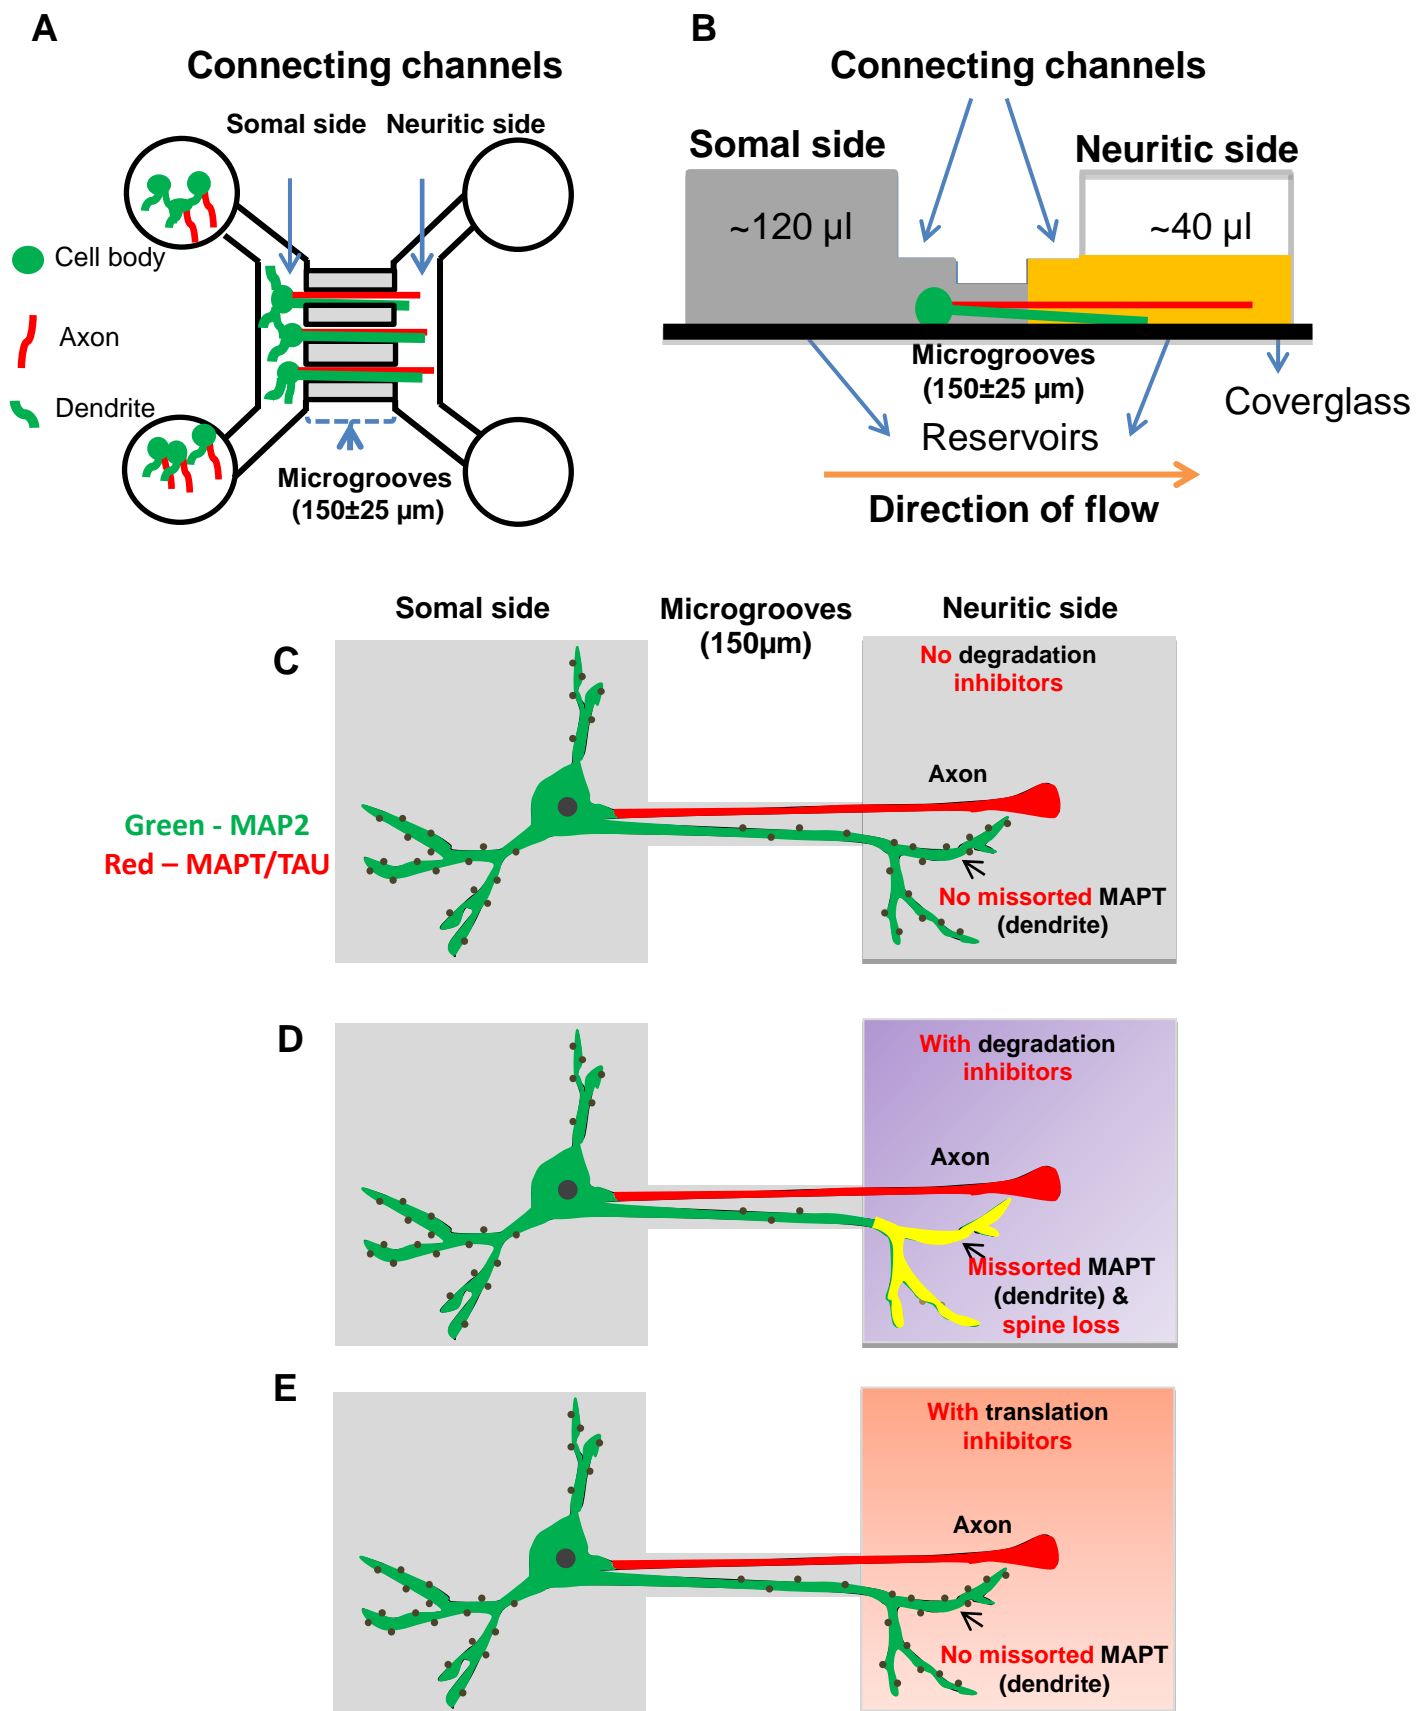

**Fig. 3 A-D**

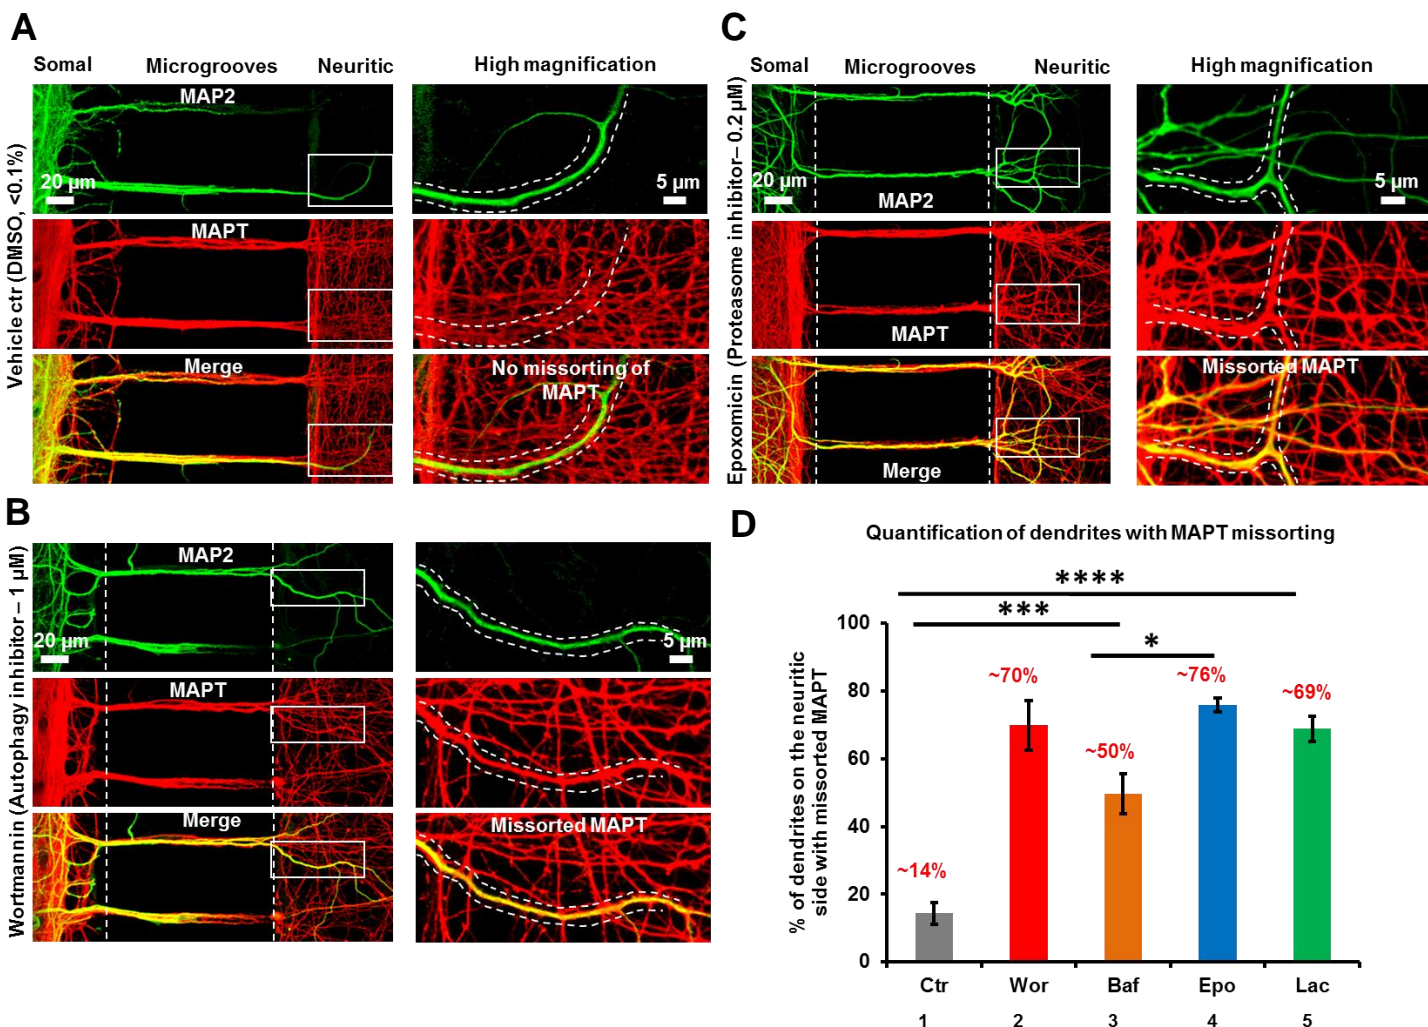

**Fig. 4 A-D**

**A** Vehicle ctr (DMSO, <0.1%), 24 h, neuritic side

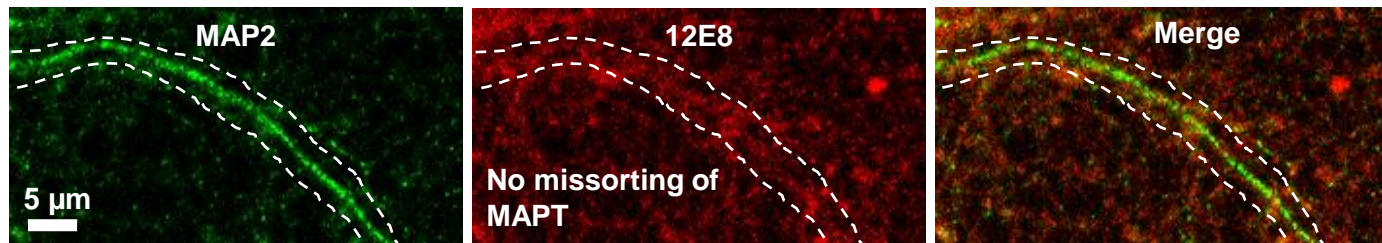

**B** Wortmannin (Autophagy inhibitor – 1  $\mu$ M), 24 h, neuritic side

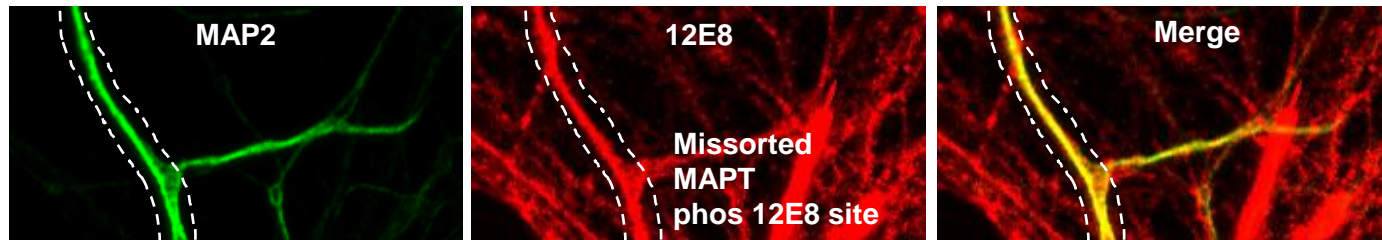

**C** Epoxomicin (Proteasome inhibitor – 0.2  $\mu$ M), 24 h, neuritic side

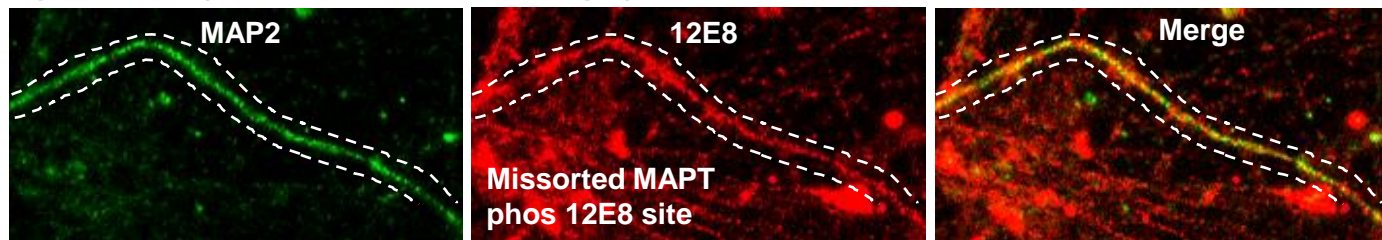

**D** Quantification of dendrites with missorted phosphorylated MAPT after treatment

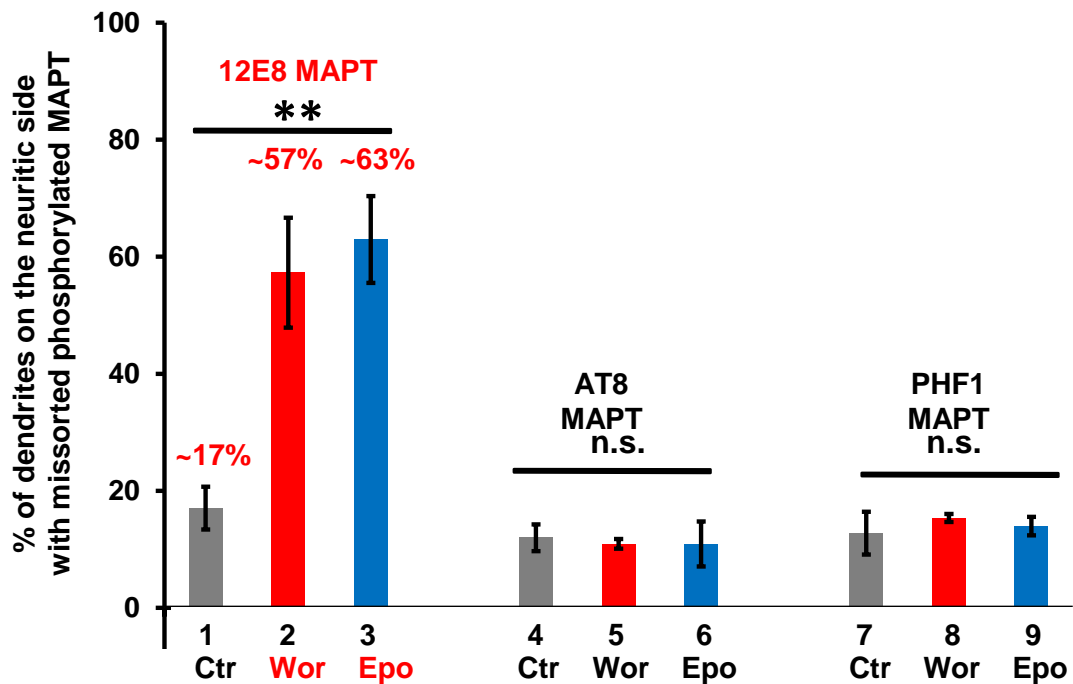



**Fig. 5 A-D**

**A**

Trehalose (Autophagy enhancer -150 mM), 24 h, neuritic side

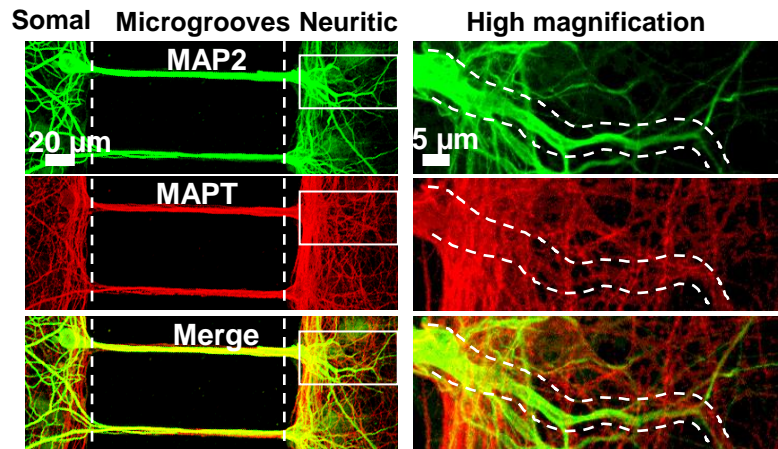

**B**

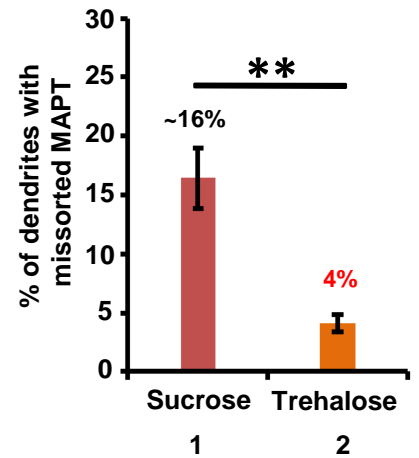

**C**

Rolipram (Proteasome enhancer – 10  $\mu$ M), 24 h, neuritic side

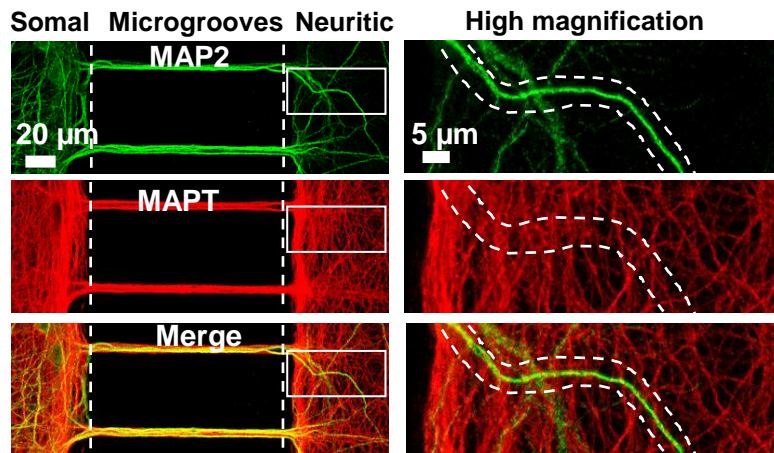

**D**

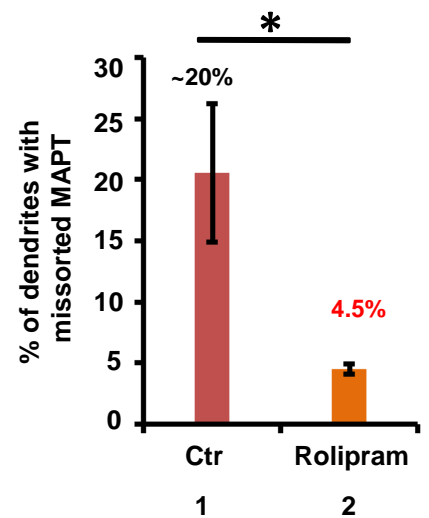

**Fig. 6 A-E**

**A**

Vehicle ctr (DMSO, <0.1%), 24 h, neuritic side

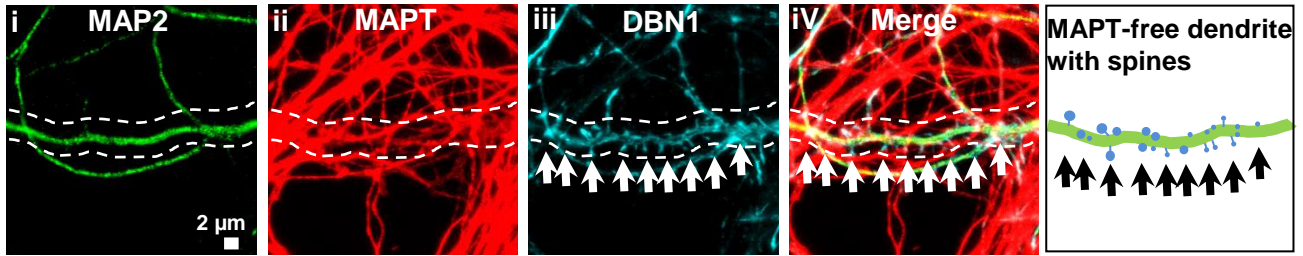

**B**

Wortmannin (Autophagy inhibitor – 1  $\mu$ M), 24 h, neuritic side

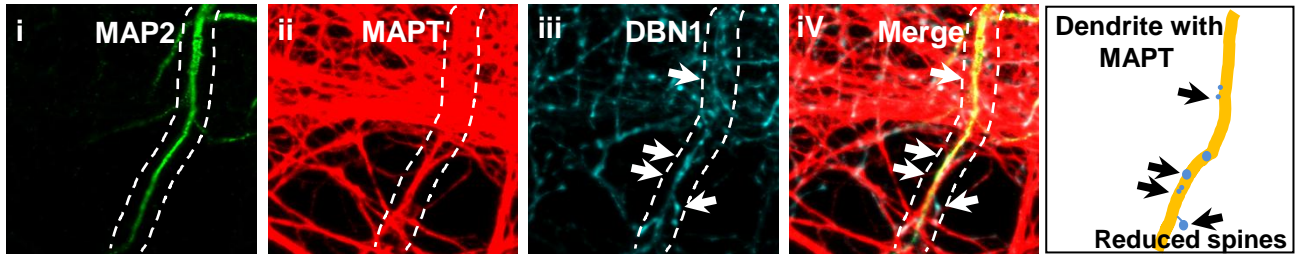

**C**

Epoxomicin (Proteasome inhibitor – 0.2  $\mu$ M), 24 h, neuritic side

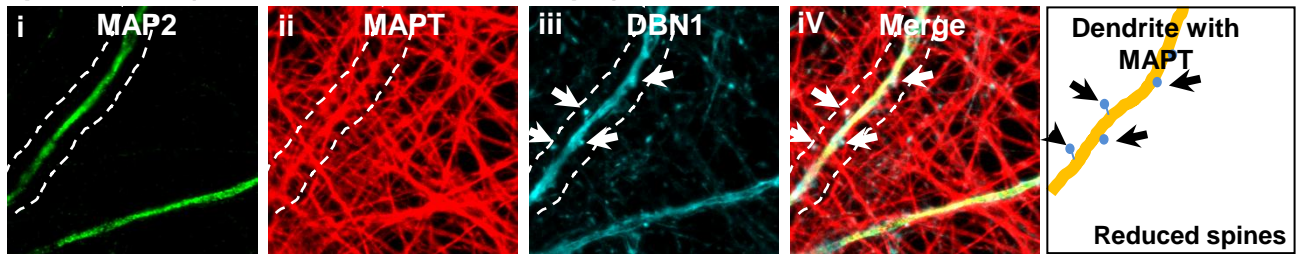

**D**

Quantification of spine density

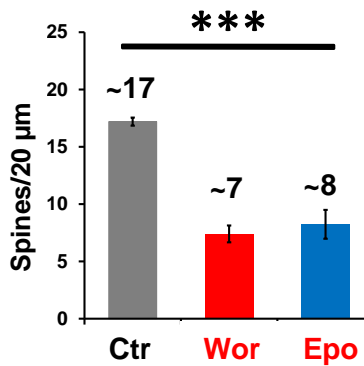

**E**

Enlarged version of fig.6Aiii

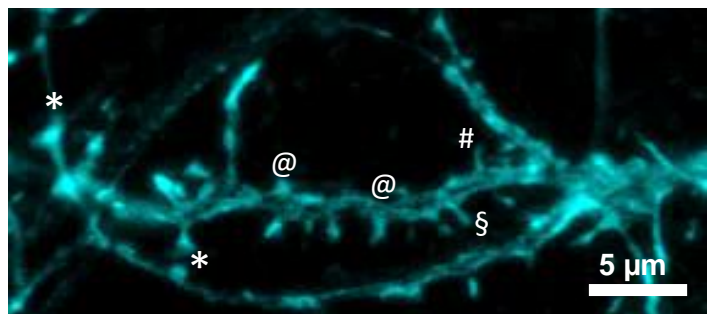



**Fig. 7 A-H**

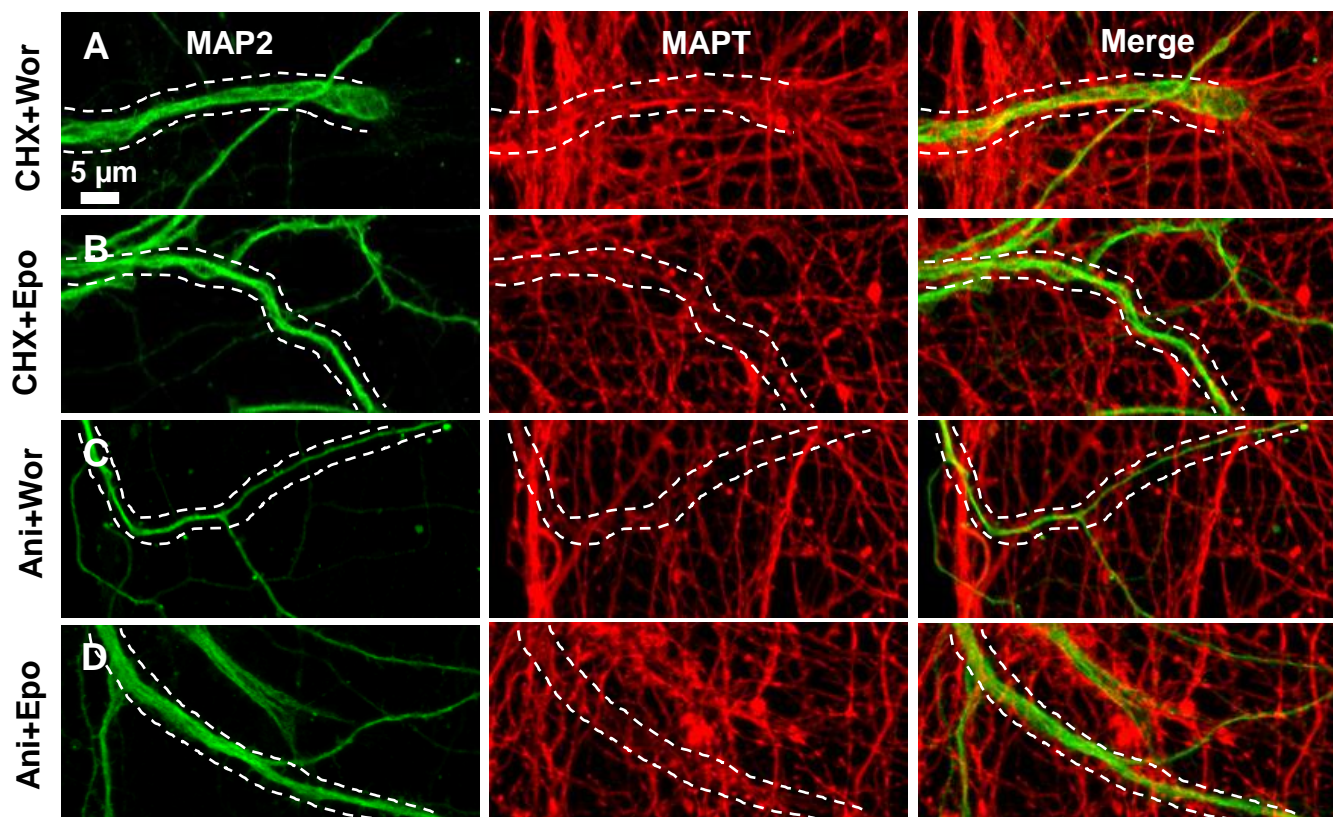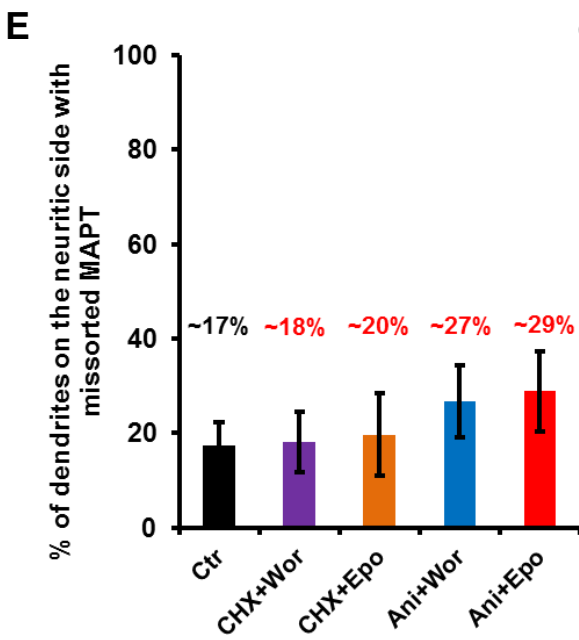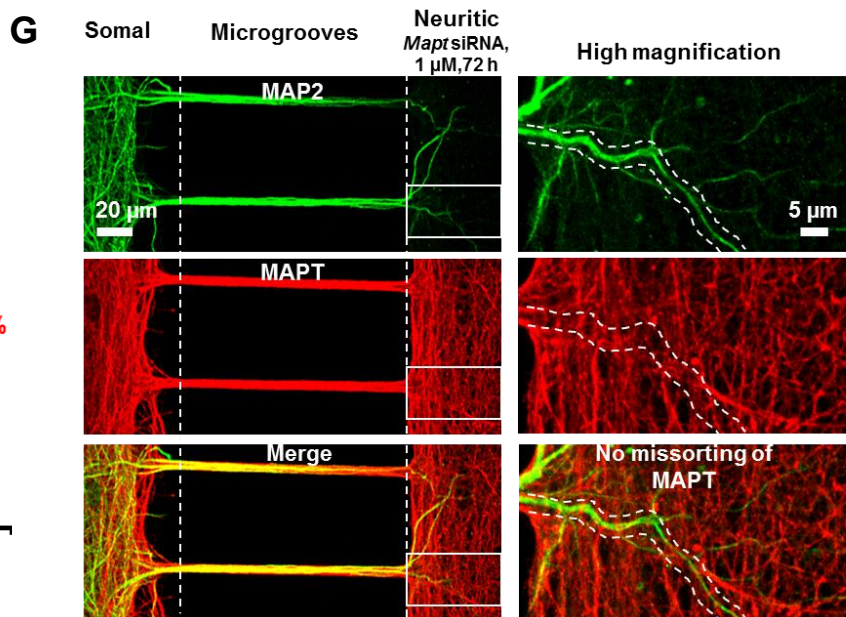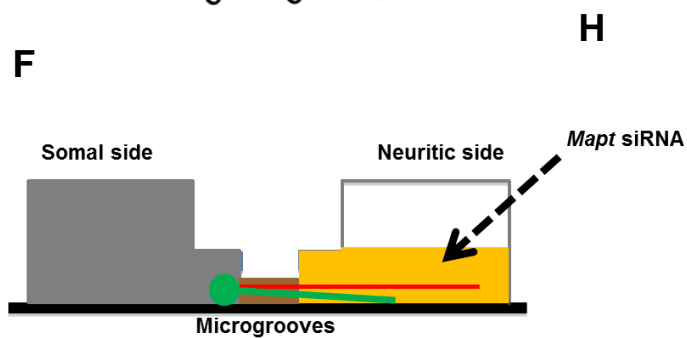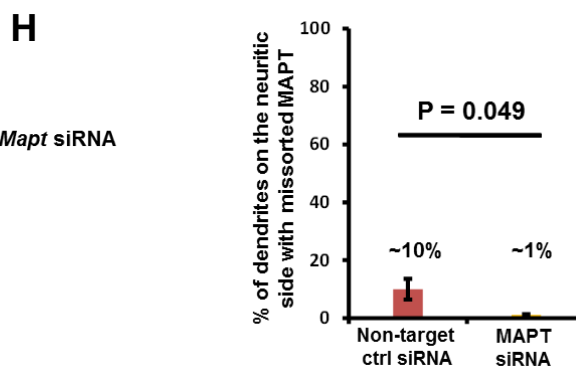

**Fig. 8 A-E**

Fluorescence *in situ* hybridization of *Mapt/Tau* mRNA in rat hippocampal neurons cultured in microfluidic chambers

*Mapt/Tau* mRNA in dendrites on the neuritic side

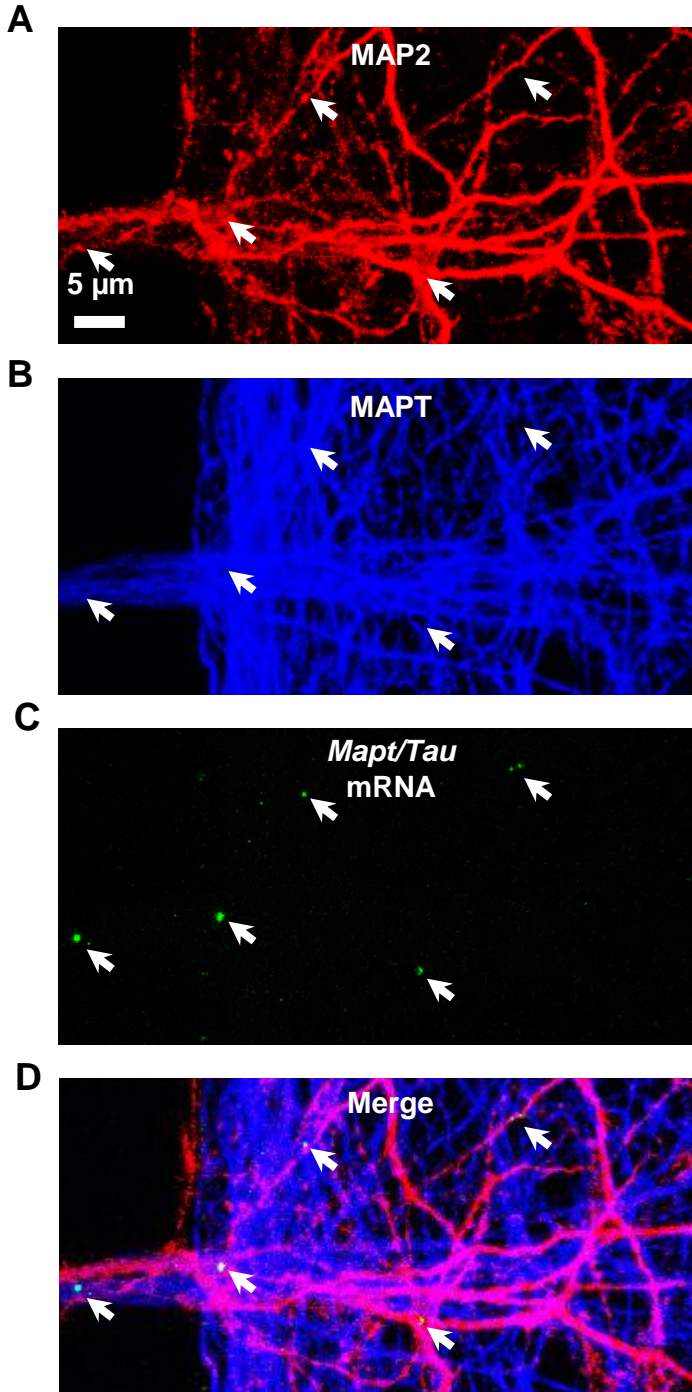

**E** Quantification of the average number of *Mapt/Tau* mRNA

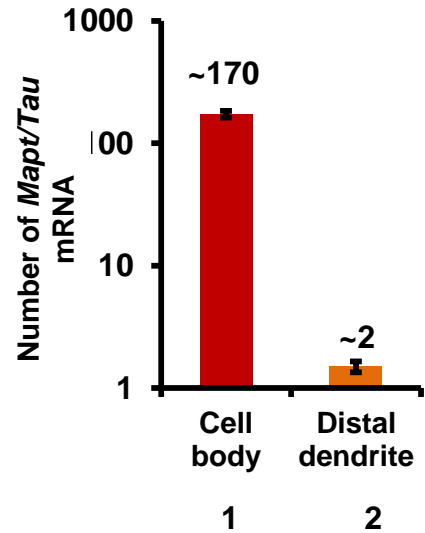



**Fig. S1 A-C**

**A Test with Alexa Fluor 488 IgG**

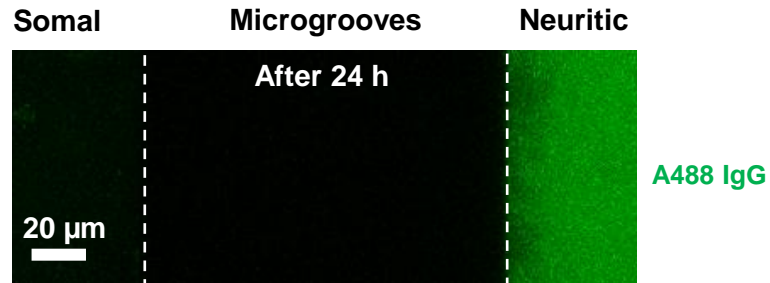

**B Test with Alexa Fluor 488 dye**

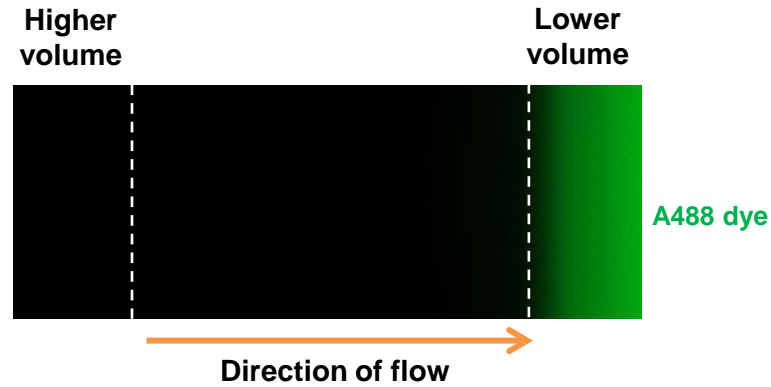

**C Orthogonal view of axons and dendrites in microgrooves**

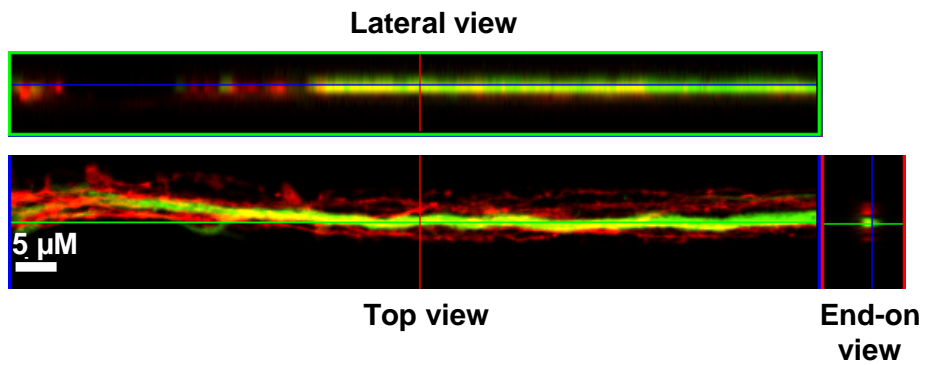

**Fig. S2**

**on neuritic side**

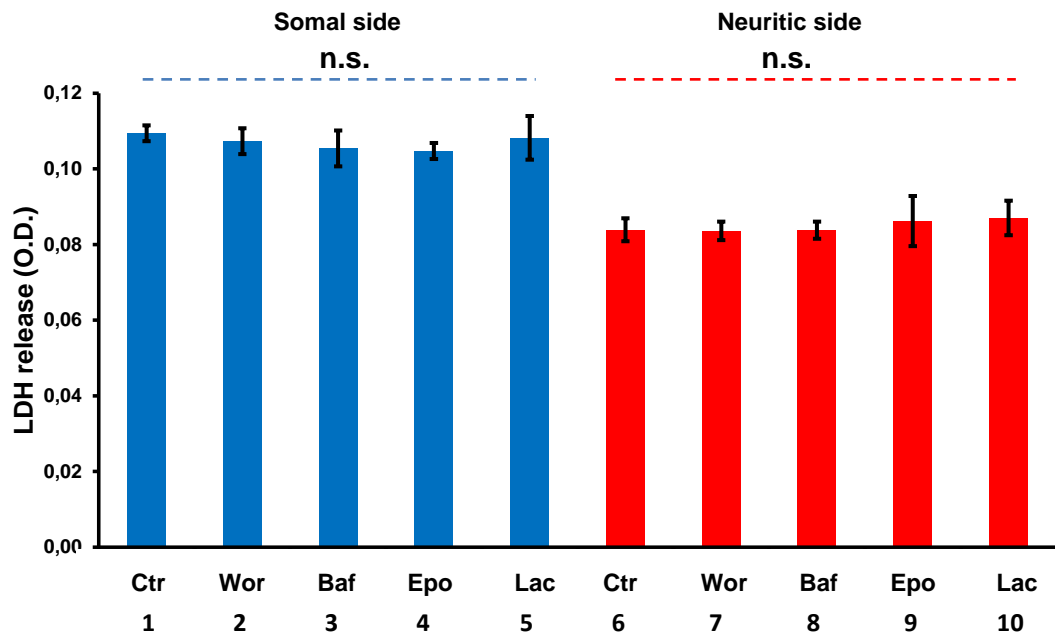

**Fig. S3 A-C**

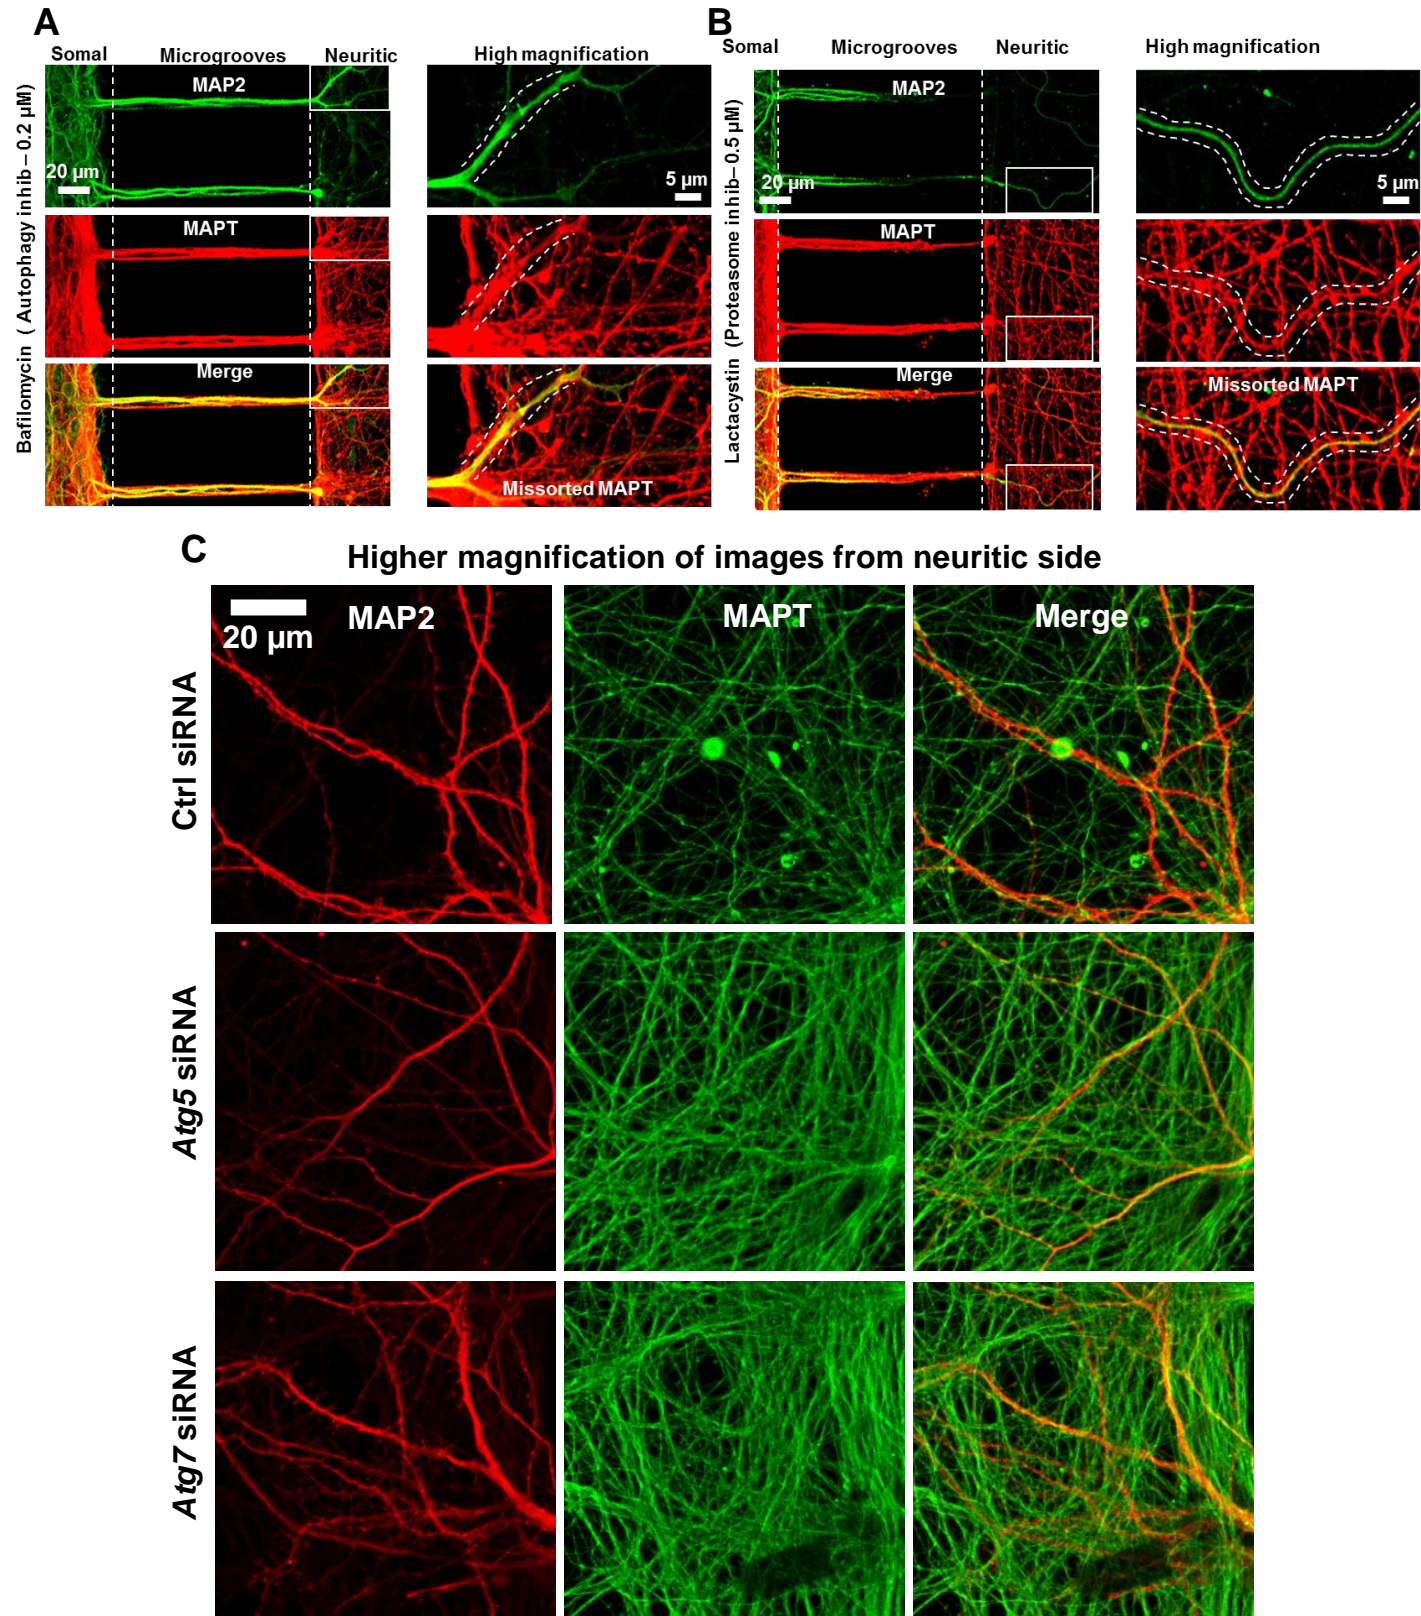



**Fig. S4 A-J**

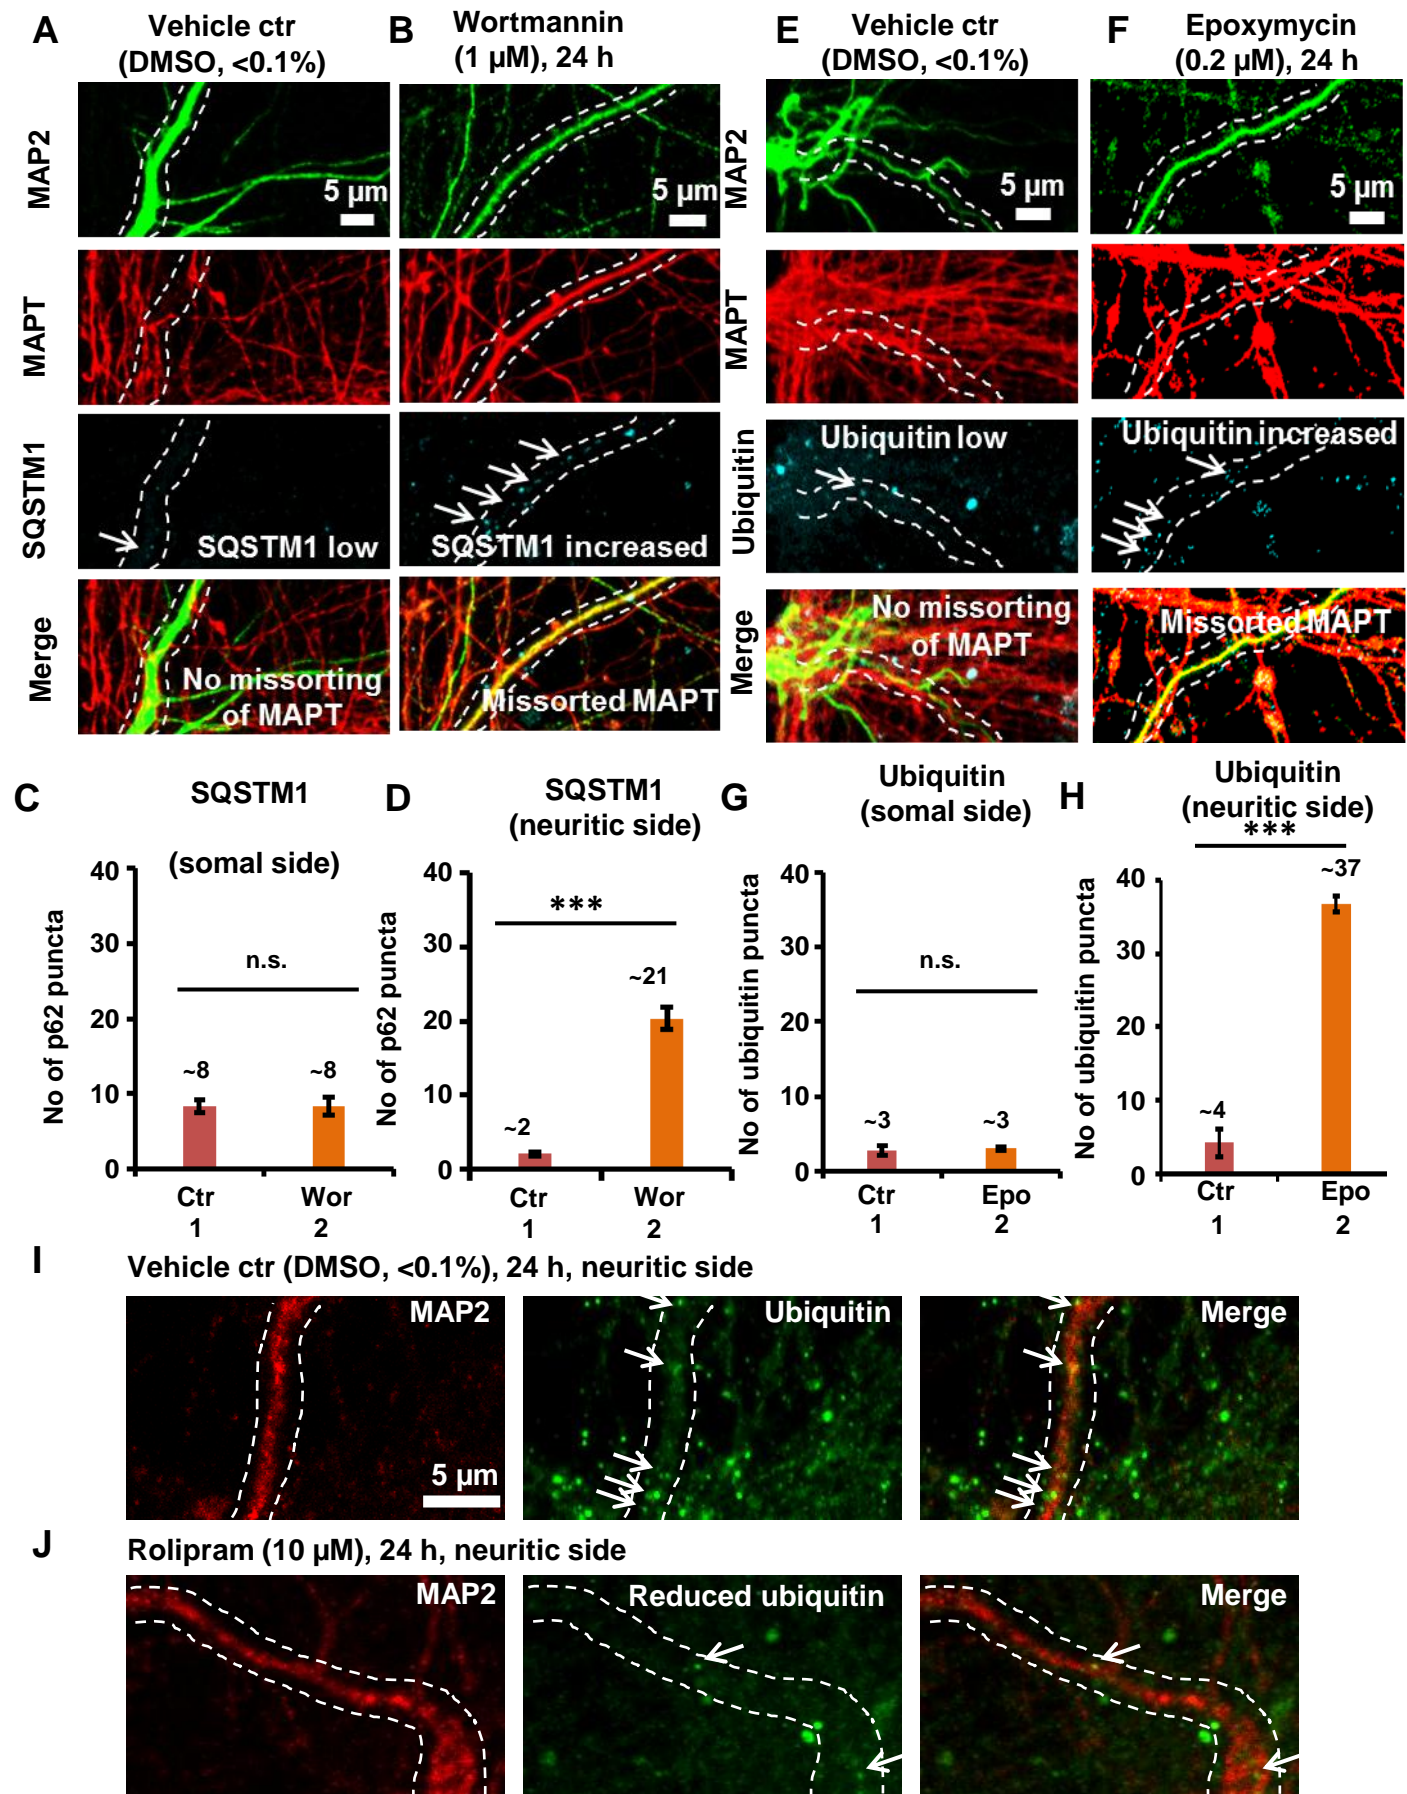

**Fig. S5 A-F**

**A** Vehicle ctr (DMSO, <0.1%) (AT8)

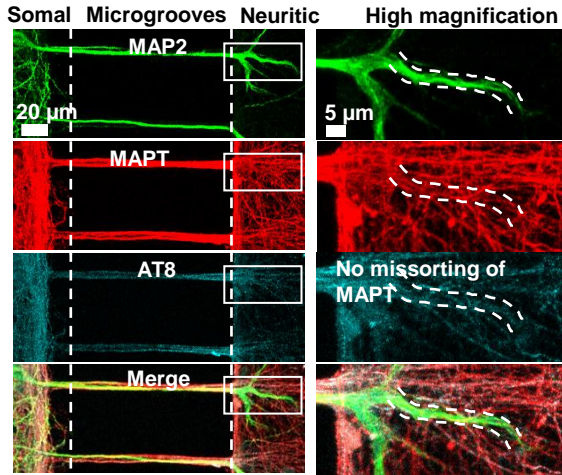

**B** Wortmannin (Autophagy inhibitor – 1  $\mu$ M), 24 h, neuritic side (AT8)

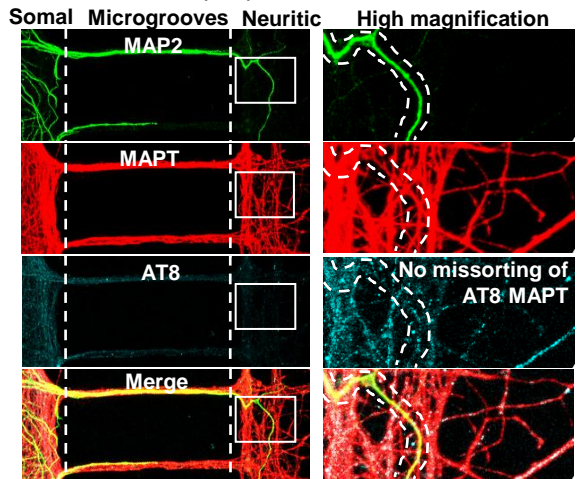

**C** Epoxomicin (Proteasome inhibitor – 0.2  $\mu$ M), 24 h, neuritic side (AT8)

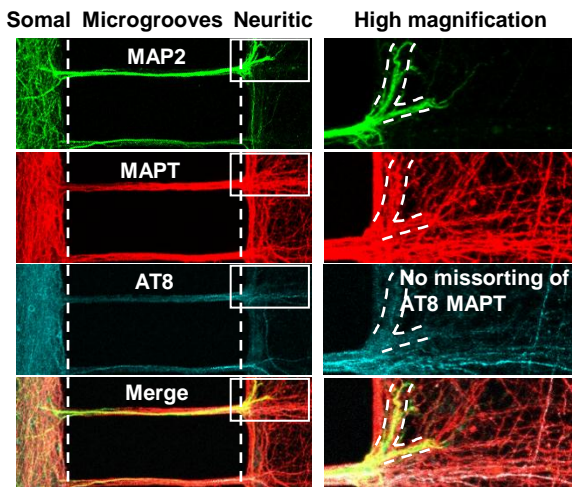

**D** Vehicle ctr (DMSO, <0.1%) (PHF1)

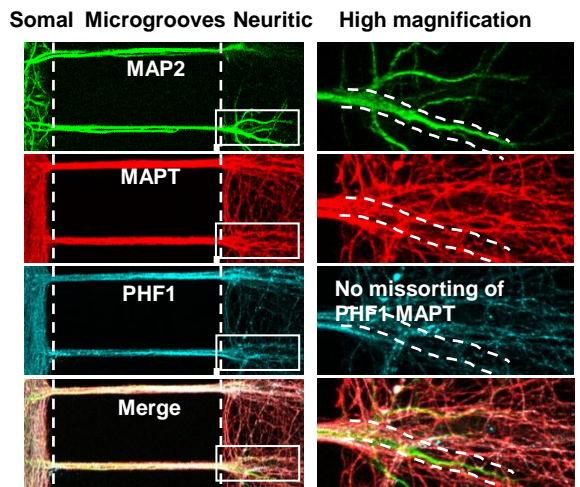

**E** Wortmannin (Autophagy inhibitor – 1  $\mu$ M), 24 h, neuritic side (PHF1)

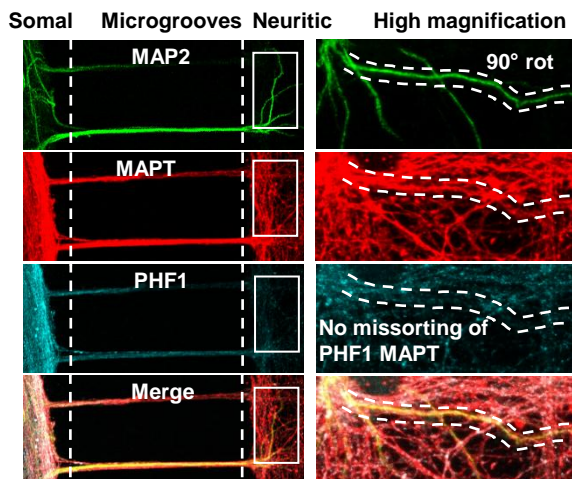

**F** Epoxomicin (Proteasome inhibitor – 0.2  $\mu$ M), 24 h, neuritic side (PHF1)

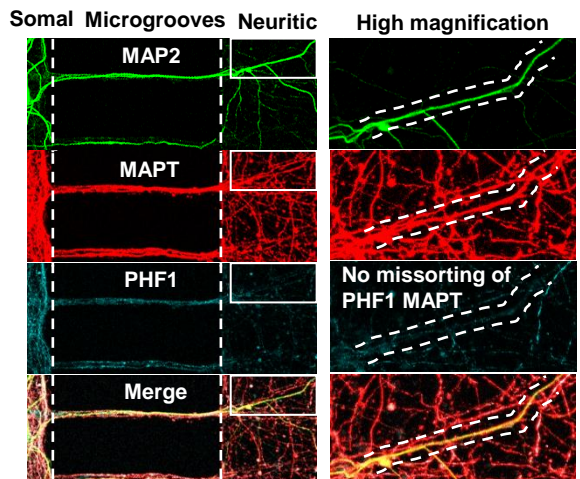



**Fig. S6 A-F**

**A** Vehicle ctr (DMSO, <0.1%), 24 h, neuritic side

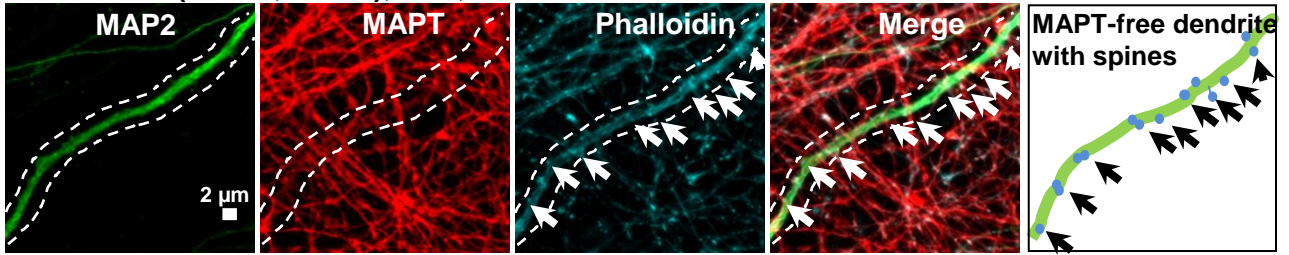

**B** Wortmannin (Autophagy inhibitor – 1 µM), 24 h, neuritic side

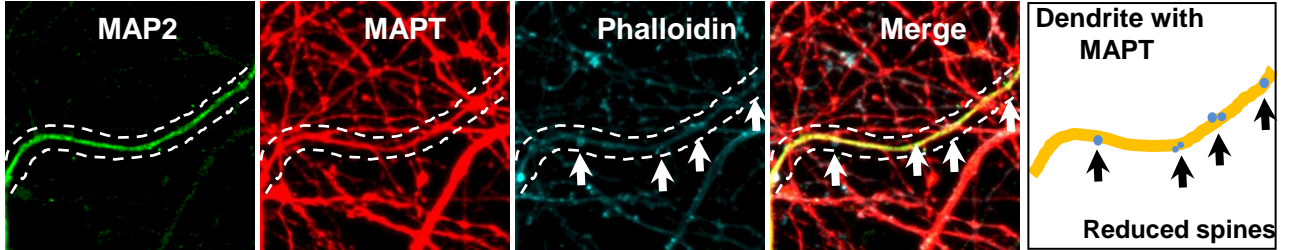

**C** Epoxomicin (Proteasome inhibitor – 0.2 µM), 24 h, neuritic side

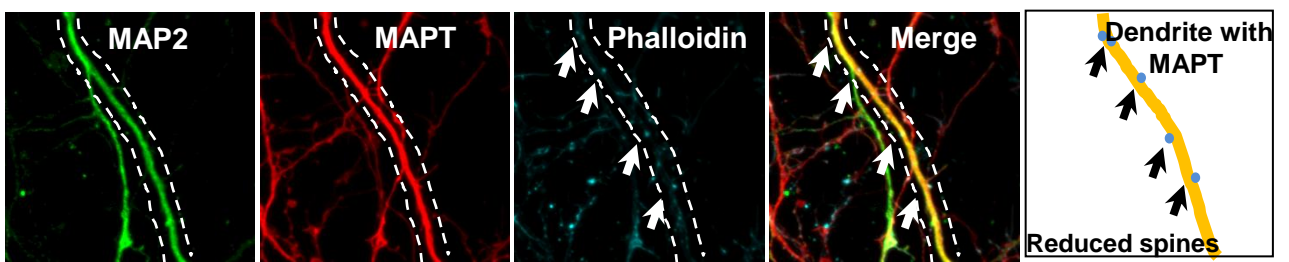

**D** Quantification of spine density

**E**

Rat hippocampal neurons (DIV21) – Whole neuronal culture

Ctrl (DMSO, <0.1%, 24 h)

Bafilomycin (0.2 µM, 24 h)

Lactacystin (0.5 µM, 24 h)

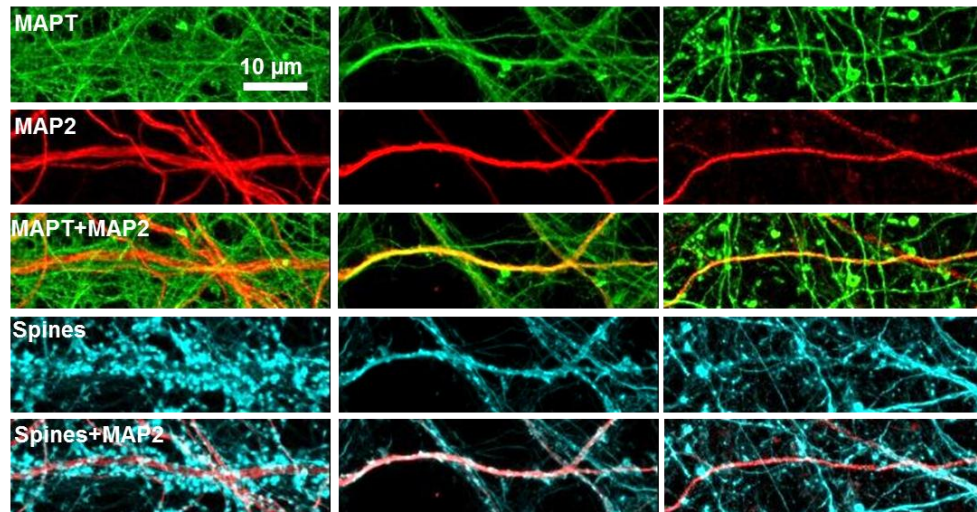

No missorting of MAPT and No spine loss

Missorting of MAPT and spine loss

Missorting of MAPT and spine loss

**F**

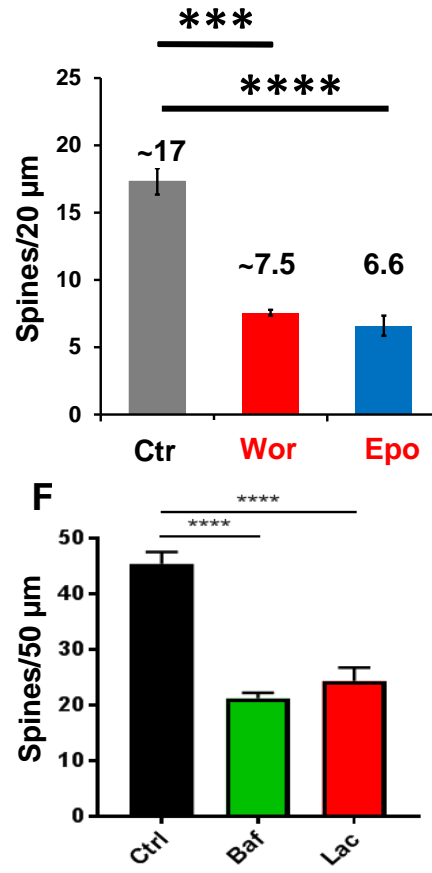



**Fig. S7 A-D**

**MAPT knock-out neurons**

**A Vehicle ctr (DMSO, <0.1%), 24 h, neuritic side**

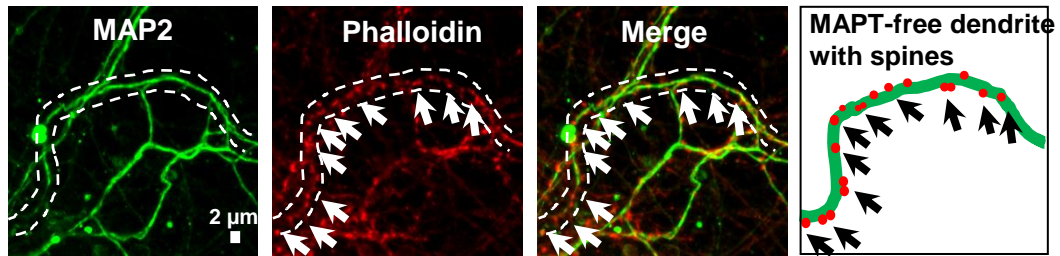

**B Wortmannin (Autophagy inhibitor – 1  $\mu\text{M}$ ), 24 h, neuritic side**

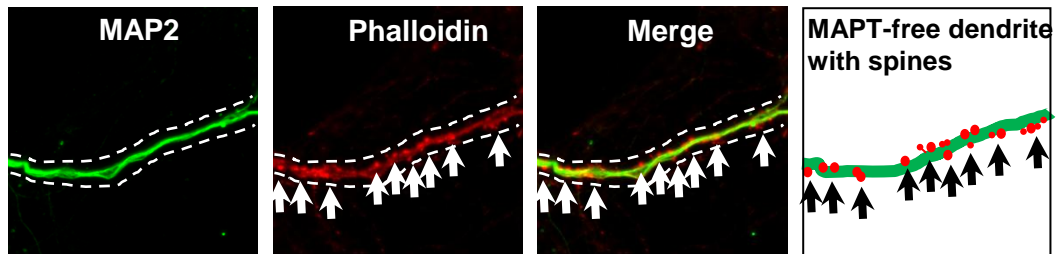

**C Epoxomicin (Proteasome inhibitor – 0.2  $\mu\text{M}$ ), 24 h, neuritic side**

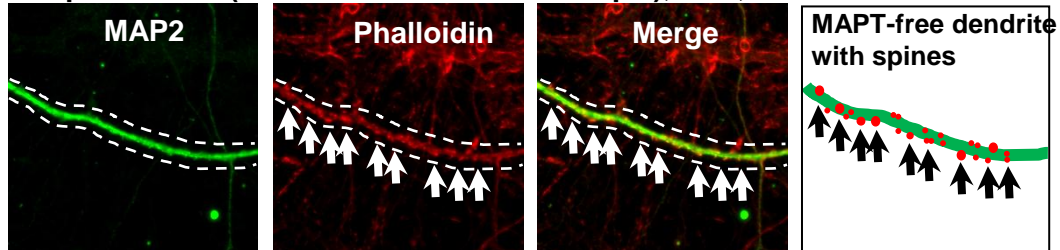

**D Quantification of spine density**

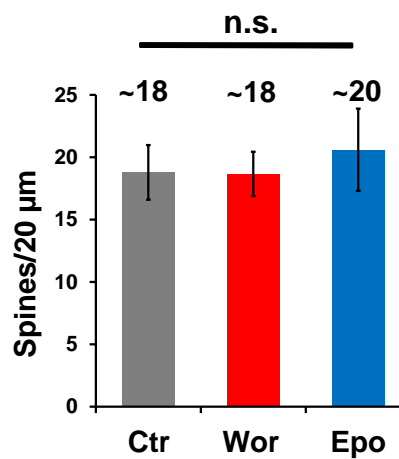

## Fig. S8 A and B

### A Cycloheximide (Protein translation inhibitor – 10 $\mu$ M), 24 h, neuritic side

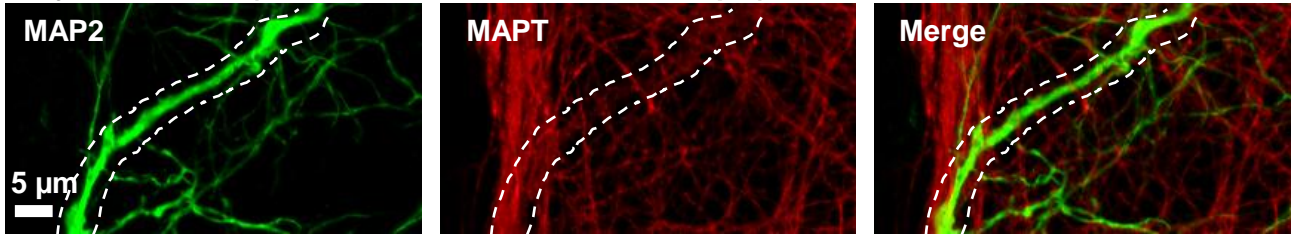

### B Anisomycin (Protein translation inhibitor – 10 $\mu$ M), 24 h, neuritic side

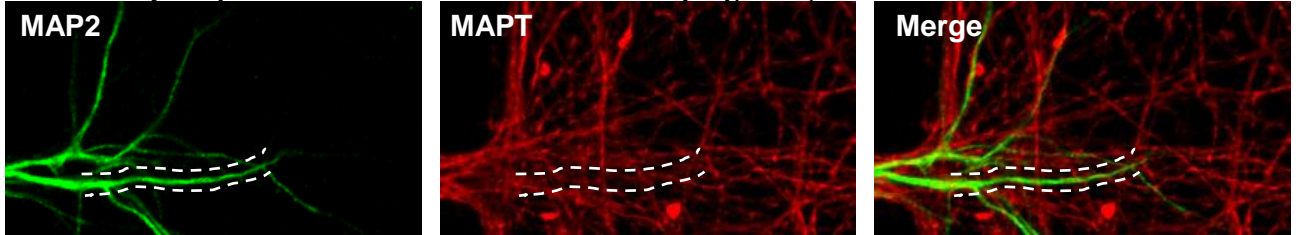

**Fig. S9 A and B**

**A**

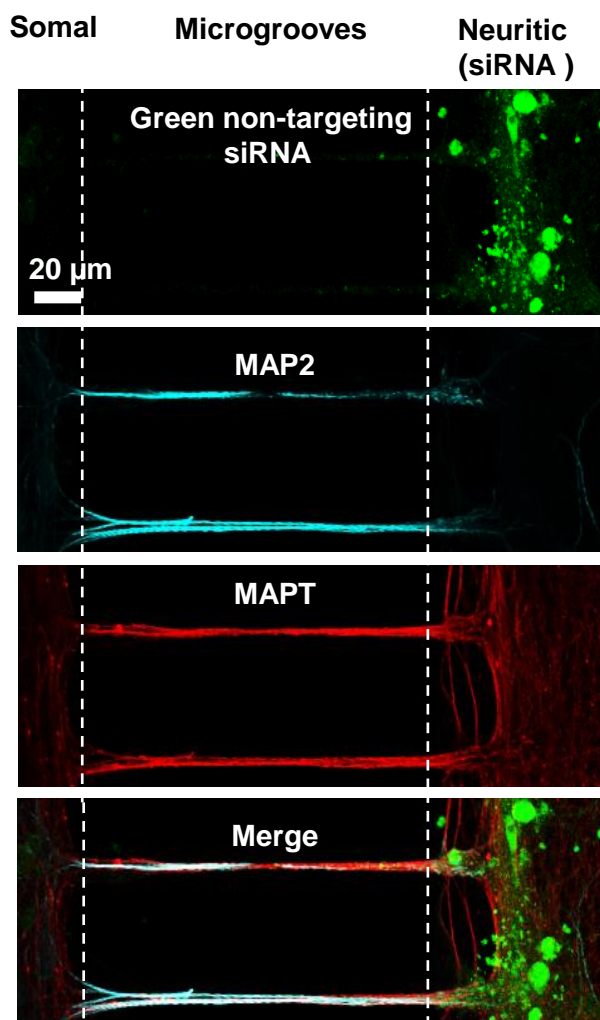

**B**

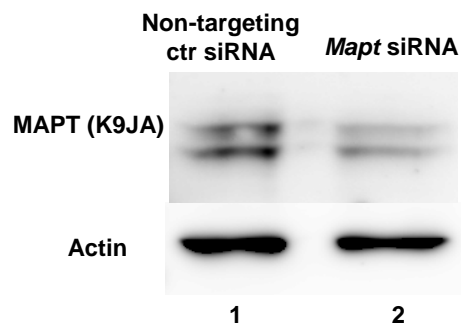



Fig. S10 A and B

A

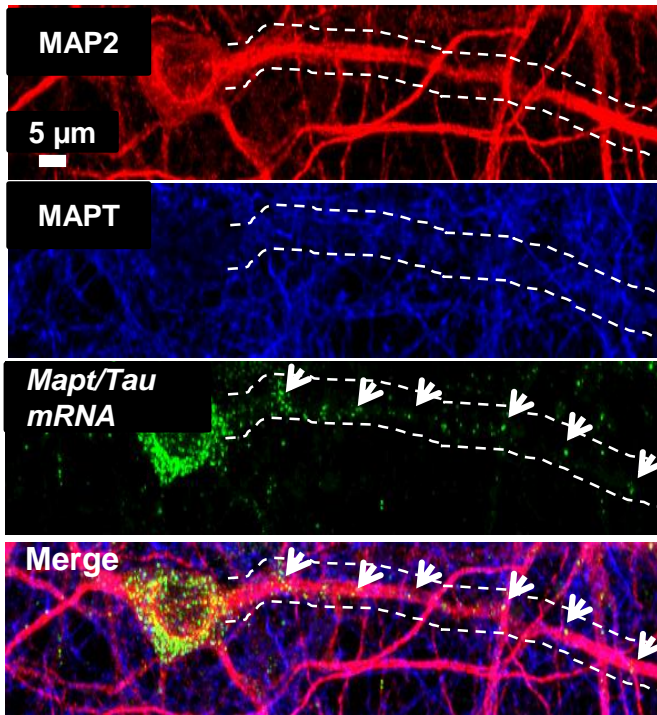

B

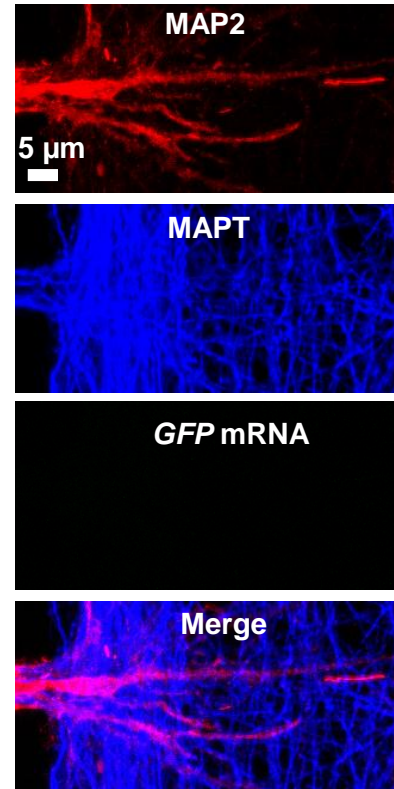

Supplement: Supplementary file 1 [file 1]
